# Supplementary material for: Assocation Between Leber's Hereditary Optic Neuropathy and MT-ND1 3460G>A Mutation-Induced Alterations in Mitochondrial Function, Apoptosis, and Mitophagy
Source: PubMed Central journal article supplement — Invest Ophthalmol Vis Sci. 2021 Jul 26;62(9):38. doi: 10.1167/iovs.62.9.38 (PMC8322717; doi:10.1167/iovs.62.9.38), 2021-07-26
Supplement: iovs-62-9-38_s001.pdf [file iovs-62-9-38_s001.pdf]

*Supplementary data*

**Leber's hereditary optic neuropathy was manifested by ND1 3460G>A mutation-induced alterations in mitochondrial function, apoptosis and mitophagy**

Juanjuan Zhang<sup>1,2</sup>, Yanchun Ji<sup>3,4</sup>, Jie Chen<sup>2</sup>, Man Xu<sup>2</sup>, Guoping Wang<sup>2</sup>, Xiaorui Ci<sup>2</sup>, Bing Lin<sup>1</sup>, Jun Q. Mo<sup>5</sup>, Xiangtian Zhou<sup>1,2</sup>, Min-Xin Guan<sup>2,3,4,6</sup>

**Supplemental Figure S1, S2**

**Supplemental Table S1, S2, S3 and S4**

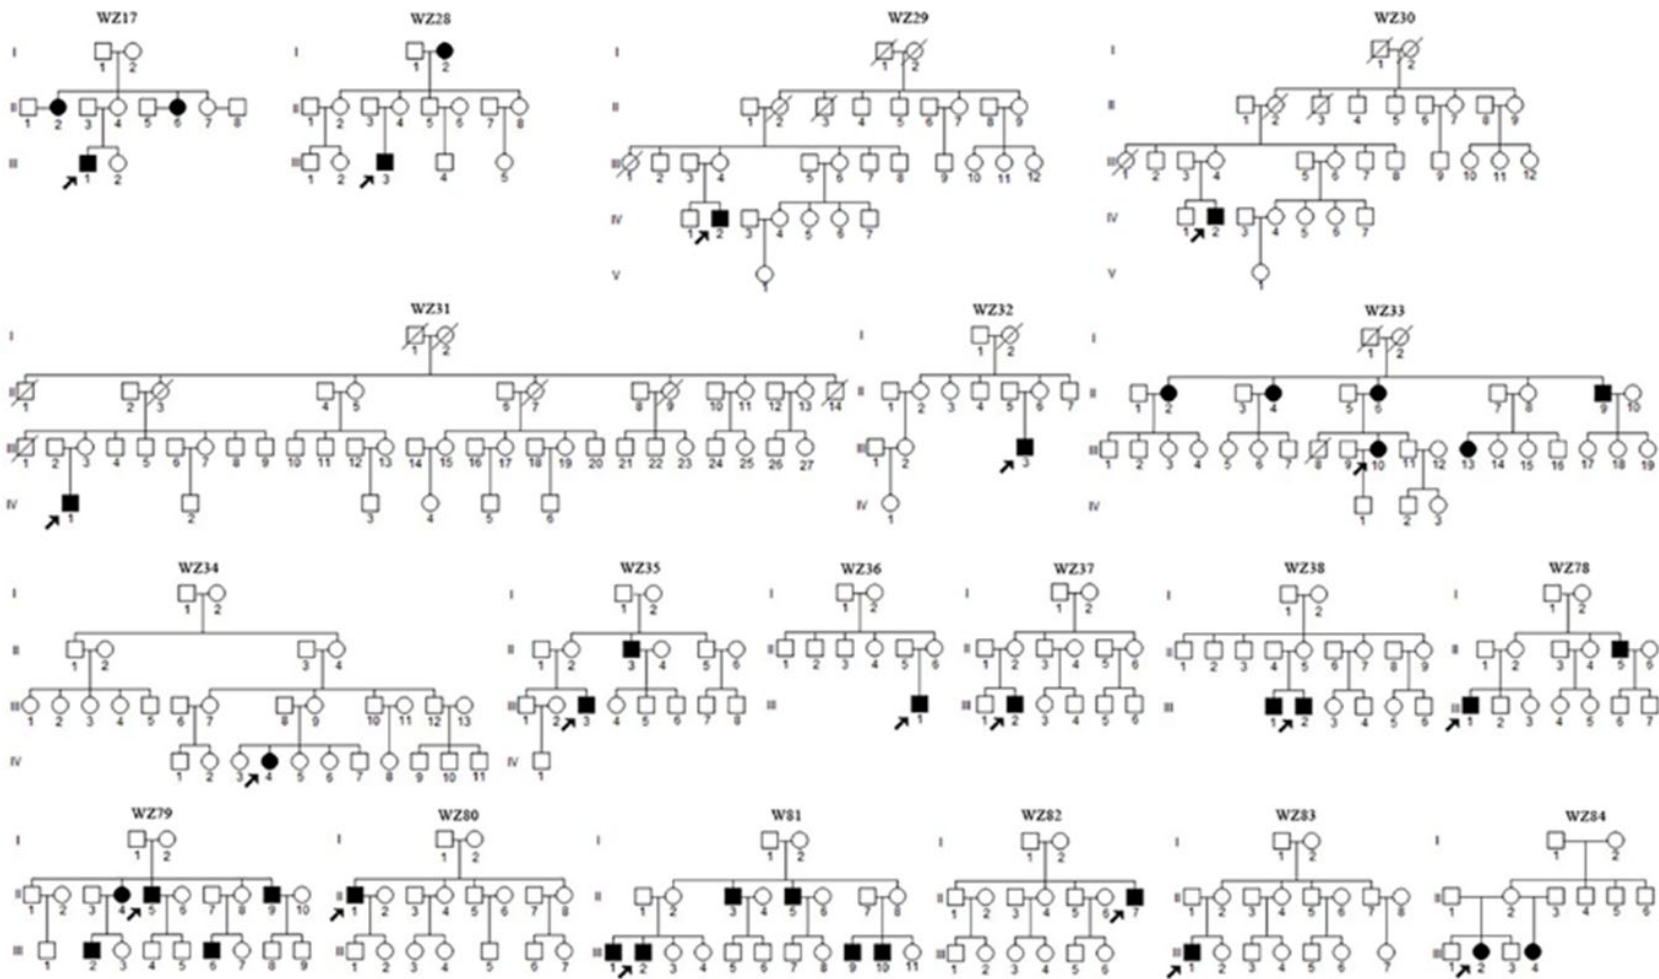

**Figure S 1.** Nineteen Han Chinese pedigrees with Leber's hereditary optic neuropathy. Vision impairment individuals are indicated by filled symbols. Arrow denotes the probands.



Table S1. Summary of clinical data for 19 probands carrying m.3460G>A mutation.

| Subject    | Gender | Age of test<br>(years) | Age-of-onset<br>(years) | Visual acuity<br>(right) | Visual acuity<br>(left) | level of vision<br>impairment |
|------------|--------|------------------------|-------------------------|--------------------------|-------------------------|-------------------------------|
| WZ17-III-1 | M      | 14                     | 14                      | 0.05                     | 0.02                    | Severe                        |
| WZ28-III-3 | M      | 16                     | 16                      | 0.02                     | 0.03                    | Severe                        |
| WZ29-IV-2  | M      | 23                     | 22                      | 0.1                      | 0.1                     | Mild                          |
| WZ30-IV-2  | M      | 18                     | 18                      | 0.02                     | 0.03                    | Severe                        |
| WZ31-IV-1  | M      | 27                     | 25                      | 0.1                      | 0.1                     | Mild                          |
| WZ32-III-3 | M      | 20                     | 20                      | 0.08                     | 0.03                    | Moderate                      |
| WZ33-IV-9  | F      | 38                     | 15                      | 0.03                     | 0.05                    | Severe                        |
| WZ34-IV-4  | F      | 19                     | 19                      | 0.01                     | FC/30cm                 | Profound                      |
| WZ35-III-3 | M      | 33                     | 23                      | 0.02                     | 0.02                    | Severe                        |
| WZ36-III-1 | M      | 26                     | 26                      | 0.06                     | 0.05                    | Moderate                      |
| WZ37-III-2 | M      | 14                     | 14                      | 0.1                      | 0.04                    | Mild                          |
| WZ38-III-2 | M      | 19                     | 19                      | FC/20cm                  | 0.04                    | Profound                      |
| WZ78-III-1 | M      | 25                     | 25                      | 0.08                     | 0.08                    | Moderate                      |
| WZ79-II-5  | F      | 21                     | 17                      | 0.06                     | 0.1                     | Moderate                      |
| WZ80-II-1  | M      | 24                     | 19                      | 0.03                     | 0.02                    | Severe                        |
| WZ81-III-2 | M      | 22                     | 20                      | 0.01                     | 0.01                    | Profound                      |
| WZ82-II-7  | M      | 40                     | 20                      | 0.08                     | 0.06                    | Moderate                      |
| WZ83-III-1 | M      | 5                      | 5                       | FC/1m                    | FC/1.5m                 | Profound                      |
| WZ84-III-2 | M      | 7                      | 5                       | 0.06                     | 0.08                    | Moderate                      |

The degree of visual impairment was defined according to the visual acuity as follows:  
normal >0.3, mild =0.3-0.1; moderate<0.1-0.05; severe<0.05-0.02; and profound <0.02.  
M, Male; F, Female; CF, counting fingers;

**Table S2. Summary of clinical and molecular data for 19 Chinese families carrying the m.3460G>A mutation.**

| Pedigree | Number of matrilineal relatives | Penetrance | Average age-at-onset | Ratio Affected male/affected female | mtDNA haplogroup |
|----------|---------------------------------|------------|----------------------|-------------------------------------|------------------|
| WZ17     | 7                               | 42.9       | 14                   | 1/2                                 | M7b2             |
| WZ28     | 9                               | 22.2       | 16                   | 1/1                                 | D5               |
| WZ29     | 24                              | 4.2        | 22                   | 1/0                                 | B5b              |
| WZ30     | 28                              | 10.7       | 18                   | 1/0                                 | R9               |
| WZ31     | 36                              | 2.8        | 25                   | 1/0                                 | F1               |
| WZ32     | 9                               | 11.1       | 20                   | 1/0                                 | C4a1             |
| WZ33     | 21                              | 28.6       | 28.7                 | 1/5                                 | A                |
| WZ34     | 14                              | 7.1        | 19                   | 0/1                                 | M7b1             |
| WZ35     | 6                               | 33.3       | 23                   | 2/0                                 | M12              |
| WZ36     | 7                               | 14.3       | 26                   | 1/0                                 | M7c1             |
| WZ37     | 8                               | 12.5       | 14                   | 1/0                                 | H2               |
| WZ38     | 13                              | 15.4       | 20                   | 2/0                                 | F1a1             |
| WZ78     | 9                               | 22.2       | 28.5                 | 2/0                                 | D5b1             |
| WZ79     | 10                              | 50         | 16                   | 4/1                                 | M8a2             |
| WZ80     | 9                               | 11.1       | 19                   | 1/0                                 | D4b1             |
| WZ81     | 12                              | 50         | 19.8                 | 6/0                                 | B5b2             |
| WZ82     | 7                               | 14.3       | 20                   | 1/0                                 | B5a              |
| WZ83     | 9                               | 11.1       | 5                    | 1/0                                 | D4               |
| WZ84     | 9                               | 22.2       | 6                    | 0/2                                 | F2a3             |

Table S3. Summary of rRNA variants and missense variants in polypeptide genes in 19 Chinese probands.

| Gene                        | Position | Replacement | WZ17 | WZ28 | WZ29 | WZ30 | WZ31 | WZ32 | WZ33 | WZ34 | WZ35 | WZ36 | WZ37 | WZ38 | WZ78 | WZ79 | WZ80 | WZ81 | WZ82 | WZ83 | WZ84 | Amino Acid Change | Conservation index (%) <sup>§</sup> | No. of 485 Controls | Previously Reported <sup>#</sup> |     |
|-----------------------------|----------|-------------|------|------|------|------|------|------|------|------|------|------|------|------|------|------|------|------|------|------|------|-------------------|-------------------------------------|---------------------|----------------------------------|-----|
| Phe<br>12S rRNA             | 593      | T-C         |      |      |      |      |      |      |      |      |      |      |      |      |      |      |      |      |      |      | C    | 31.25             | 1                                   | Yes                 |                                  |     |
|                             | 663      | A-G         |      |      |      |      |      |      |      |      | G    |      |      |      |      |      |      |      |      |      |      |                   | 78.57                               | 20                  | Yes                              |     |
|                             | 669      | T-C         |      |      |      |      |      |      |      |      |      |      |      |      | C    |      |      |      |      |      |      |                   | 70.59                               | 0                   | Yes                              |     |
|                             | 681      | T-C         |      |      | C    |      |      |      |      |      |      |      |      |      |      |      |      |      |      |      |      |                   | 85.71                               | 7                   | No                               |     |
|                             | 709      | G-A         |      |      | A    | A    |      |      |      |      | A    |      |      |      |      |      |      |      |      |      |      |                   | 71.43                               | 67                  | Yes                              |     |
|                             | 750      | A-G         | G    | G    | G    | G    | G    | G    | G    | G    | G    | G    | G    | G    | G    | G    | G    | G    | G    | A    | A    |                   | 100.00                              | 1                   | Yes                              |     |
|                             | 961      | C-CC        |      |      | CC   |      |      |      |      |      |      |      |      |      |      |      |      |      |      |      |      |                   | 14.29                               | 1                   | Yes                              |     |
|                             | 1005     | T-C         |      |      |      |      |      |      |      |      |      |      |      |      |      |      |      |      |      |      |      | C                 | 35.71                               | 15                  | Yes                              |     |
|                             | 1048     | C-T         |      |      | T    |      |      |      |      |      |      |      |      |      | T    |      |      |      |      |      |      |                   | 64.29                               | 8                   | Yes                              |     |
|                             | 1107     | T-C         |      |      | C    |      |      |      |      |      |      |      |      |      | C    |      |      |      |      |      |      | C                 | 85.71                               | 20                  | Yes                              |     |
|                             | 1438     | A-G         |      |      | G    | G    | G    | G    | G    | G    | G    | G    | G    | G    | G    | G    | G    | G    | G    | G    | G    | G                 | 100.00                              | 339                 | Yes                              |     |
|                             | 1598     | G-A         |      |      | A    |      |      |      |      |      |      |      |      |      |      |      |      |      |      |      |      | A                 | 50.00                               | 15                  | Yes                              |     |
|                             | 16S rRNA | 1715        | A-T  |      |      |      |      |      |      |      |      | T    |      |      |      |      |      |      |      |      |      |                   |                                     | 71.43               | 3                                | Yes |
|                             |          | 1719        | G-A  |      |      |      |      |      |      |      |      |      |      |      | A    |      |      |      |      |      |      |                   |                                     | 7.14                | 5                                | Yes |
|                             |          | 1736        | A-G  |      |      |      |      |      |      |      |      | G    |      |      |      |      |      |      |      |      |      |                   |                                     | 57.14               | 0                                | Yes |
|                             |          | 1824        | T-C  |      |      |      |      |      |      |      |      |      |      |      |      |      |      |      |      |      |      |                   | C                                   | 21.43               | 18                               | Yes |
| 2143                        |          | A-G         |      |      |      |      |      |      |      |      |      |      |      |      |      |      |      |      | G    |      |      |                   | 17.65                               | 0                   | No                               |     |
| 2389                        |          | C-T         |      |      |      |      |      |      |      |      | T    |      |      |      |      |      |      |      |      |      |      |                   | 76.47                               | 4                   | Yes                              |     |
| 2706                        |          | A-G         | G    | G    | G    | G    | G    | G    | G    | G    | G    | G    | G    | G    | G    | G    | G    | G    | G    | G    | G    |                   | 57.14                               | 343                 | Yes                              |     |
| 2835                        |          | C-T         |      |      |      |      |      |      |      |      |      |      |      |      |      |      |      |      |      |      |      | T                 | 57.14                               | 9                   | Yes                              |     |
| 3010                        |          | G-A         |      |      |      |      |      |      |      |      |      |      |      |      |      |      |      |      |      |      |      | A                 | 50.00                               | 60                  | Yes                              |     |
| 3172                        |          | C-CC        |      |      |      |      |      |      |      |      | CC   |      |      |      |      |      |      |      |      |      |      |                   | 35.71                               | 0                   | Yes                              |     |
| 3290                        |          | T-C         |      |      |      |      |      |      |      |      |      |      |      |      |      |      |      |      |      |      |      | C                 | 43.75                               | 2                   | Yes                              |     |
| Leu(UUR)<br>ND1             |          | 3460        | G-A  | A    | A    | A    | A    | A    | A    | A    | A    | A    | A    | A    | A    | A    | A    | A    | A    | A    | A    | A                 | A52T                                | 94.12               | 0                                | Yes |
|                             |          | 4048        | G-A  | A    |      |      |      |      |      |      |      |      |      |      |      |      |      |      |      |      |      |                   | D248N                               | 7.14                | 13                               | Yes |
| Ile<br>Gln                  |          | 4216        | T-C  |      |      |      |      |      |      |      |      |      |      |      |      |      |      |      |      |      |      |                   | Y304H                               | 50.00               | 5                                | Yes |
|                             |          | 4316        | A-G  |      |      |      |      |      |      |      |      | G    |      |      |      |      |      |      |      |      |      |                   |                                     | 94.12               | 0                                | Yes |
| ND2                         |          | 4336        | T-C  |      |      | C    |      |      |      |      |      |      |      |      |      |      |      |      |      |      |      |                   |                                     | 70.59               | 0                                | Yes |
|                             | 4824     | A-G         |      |      |      |      |      |      |      |      | G    |      |      |      |      |      |      |      |      |      |      | T114A             | 100.00                              | 21                  | Yes                              |     |
| CO1<br>CO2<br>ATP8<br>ATP6  | 4924     | G-A         |      |      | A    |      |      |      |      |      |      |      |      |      |      |      |      |      |      |      |      | S152N             | 17.65                               | 0                   | Yes                              |     |
|                             | 5178     | C-A         |      |      | A    |      |      |      |      |      |      |      |      |      |      |      |      |      |      |      |      | L237M             | 57.14                               | 77                  | Yes                              |     |
|                             | 5301     | A-G         |      |      | G    |      |      |      |      |      |      |      |      |      |      |      |      |      |      |      |      | I278V             | 42.86                               | 20                  | Yes                              |     |
|                             | 5442     | T-C         |      |      |      |      |      |      |      |      |      |      |      |      |      |      |      |      |      |      |      | C                 | 35.71                               | 15                  | Yes                              |     |
|                             | 5460     | G-A         |      |      |      |      |      |      |      |      | A    |      |      |      |      |      |      |      |      |      |      | A331T             | 7.14                                | 11                  | Yes                              |     |
|                             | 6253     | T-C         |      |      | C    |      |      |      |      |      |      |      |      |      |      |      |      |      |      |      |      | C                 | M117T                               | 57.14               | 7                                | Yes |
|                             | 7853     | G-A         |      |      |      |      |      |      |      |      | A    |      |      |      |      |      |      |      |      |      |      | V90I              | 28.57                               | 17                  | Yes                              |     |
|                             | 8414     | C-T         |      |      |      |      |      |      |      |      |      |      |      |      |      |      |      |      |      |      |      | L17F              | 71.43                               | 57                  | Yes                              |     |
|                             | 8584     | G-A         |      |      | A    |      |      |      |      |      | A    |      |      |      |      |      |      |      |      |      |      | A20T              | 50.00                               | 58                  | Yes                              |     |
|                             | 8618     | T-C         |      |      |      |      |      |      |      |      |      |      |      |      |      |      |      |      |      |      |      | A                 | A20T                                | 50.00               | 58                               | Yes |
| CO3<br>ND3<br>ND4L<br>ND4   | 8618     | T-C         |      |      |      |      |      |      |      |      |      |      |      |      |      |      |      |      |      |      |      | I31T              | 58.82                               | 1                   | Yes                              |     |
|                             | 8684     | C-T         |      |      |      |      |      |      |      |      |      |      |      |      |      |      |      |      |      |      |      | T53I              | 64.29                               | 14                  | Yes                              |     |
|                             | 8701     | A-G         | G    | G    |      | G    |      | G    | G    | G    | G    | G    | G    | G    | G    | G    | G    | G    | G    | G    | G    | T59A              | 64.29                               | 160                 | Yes                              |     |
|                             | 8794     | C-T         |      |      |      |      |      |      |      |      |      |      |      |      |      |      |      |      |      |      |      | H90Y              | 71.43                               | 23                  | Yes                              |     |
|                             | 8860     | A-G         | G    | G    | G    | G    | G    | G    | G    | T    | G    | G    | G    | G    | G    | G    | G    | G    | G    | G    | G    | T112A             | 78.57                               | 334                 | Yes                              |     |
|                             | 9010     | G-A         |      |      |      |      |      |      |      |      |      |      |      |      |      |      |      |      |      |      |      | A162T             | 100.00                              | 0                   | Yes                              |     |
|                             | 9300     | G-A         |      |      |      |      |      |      |      |      |      |      |      |      |      |      |      |      |      |      |      | A32T              | 47.06                               | 0                   | Yes                              |     |
|                             | 9490     | C-T         |      |      |      |      |      |      |      |      |      |      |      |      |      |      |      |      |      |      |      | A95V              | 76.47                               | 0                   | Yes                              |     |
|                             | 10345    | T-C         |      |      | C    |      |      |      |      |      |      |      |      |      |      |      |      |      |      |      |      | I96T              | 50.00                               | 0                   | Yes                              |     |
|                             | 10398    | A-G         | G    | G    | G    | G    | G    | G    | G    | G    | G    | G    | G    | G    | G    | G    | G    | G    | G    | G    | G    | T114A             | 35.71                               | 193                 | Yes                              |     |
| Ser <sup>(AGY)</sup><br>ND5 | 10609    | T-C         |      |      |      |      |      |      |      |      |      |      |      |      |      |      |      |      |      |      |      | M47T              | 64.29                               | 29                  | Yes                              |     |
|                             | 11204    | T-C         |      |      |      |      |      |      |      |      |      |      |      |      |      |      |      |      |      |      |      | F149L             | 100.00                              | 1                   | Yes                              |     |
|                             | 11969    | G-A         |      |      |      |      |      |      |      |      | A    |      |      |      |      |      |      |      |      |      |      | A404T             | 92.86                               | 9                   | Yes                              |     |
|                             | 12030    | A-G         |      |      |      |      |      |      |      |      |      |      |      |      |      |      |      |      |      |      |      | N424S             | 47.06                               | 0                   | Yes                              |     |
|                             | 12223    | A-G         |      |      |      |      |      |      |      |      |      |      |      |      |      |      |      |      |      |      |      | G                 | 94.12                               | 0                   | Yes                              |     |
|                             | 12338    | T-C         |      |      |      |      |      |      |      |      |      |      |      |      |      |      |      |      |      |      |      | C                 | M1T                                 | 100.00              | 16                               | Yes |
|                             | 12358    | A-G         |      |      |      |      |      |      |      |      |      |      |      |      |      |      |      |      |      |      |      | T8A               | 57.14                               | 6                   | Yes                              |     |
|                             | 12361    | A-G         |      |      | G    |      |      |      |      |      |      |      |      |      |      |      |      |      |      |      |      | T9A               | 35.71                               | 15                  | Yes                              |     |
|                             | 12406    | G-A         |      |      |      |      |      |      |      |      | A    |      |      |      |      |      |      |      |      |      |      | V24I              | 64.29                               | 31                  | Yes                              |     |
|                             | 12811    | T-C         |      |      | C    |      |      |      |      |      |      |      |      |      |      |      |      |      |      |      |      | Y159H             | 71.43                               | 11                  | Yes                              |     |
| Glu<br>Cytb                 | 12906    | C-A         |      |      |      |      |      |      |      |      |      |      |      |      |      |      |      |      |      |      |      | I190M             | 7.14                                | 2                   | Yes                              |     |
|                             | 12940    | G-A         |      |      |      |      |      |      |      |      | A    |      |      |      |      |      |      |      |      |      |      | A202T             | 7.14                                | 2                   | Yes                              |     |
|                             | 13135    | G-A         |      |      |      |      |      |      |      |      | A    |      |      |      |      |      |      |      |      |      |      | A267T             | 28.57                               | 9                   | Yes                              |     |
|                             | 13637    | A-G         |      |      |      |      |      |      |      |      | G    |      |      |      |      |      |      |      |      |      |      | Q434R             | 52.94                               | 0                   | Yes                              |     |
|                             | 13780    | A-G         |      |      |      |      |      |      |      |      |      |      |      |      |      |      |      |      |      |      |      | A458T             | 29.41                               | 0                   | Yes                              |     |
|                             | 13928    | G-C         |      |      |      |      |      |      |      |      |      |      |      |      |      |      |      |      |      |      |      | C                 | S531T                               | 14.29               | 47                               | Yes |
|                             | 14318    | T-C         |      |      |      |      |      |      |      |      | C    |      |      |      |      |      |      |      |      |      |      | N119S             | 50.00                               | 12                  | Yes                              |     |
|                             | 14502    | T-C         |      |      |      |      |      |      |      |      |      |      |      |      |      |      |      |      |      |      |      | I58V              | 71.43                               | 5                   | Yes                              |     |
|                             | 14693    | A-G         |      |      |      |      |      |      |      |      |      |      |      |      |      |      |      |      |      |      |      |                   | 100.00                              | 6                   | Yes                              |     |
|                             | 14727    | T-C         |      |      |      |      |      |      |      |      |      |      |      |      |      |      |      |      |      |      |      |                   | M1V                                 | 94.12               | 0                                | Yes |
| Thr                         | 14766    | C-T         |      |      |      |      |      |      |      |      |      |      |      |      |      |      |      |      |      |      |      | T7S               | 50.00                               | 339                 | Yes                              |     |
|                             | 14831    | G-A         |      |      |      |      |      |      |      |      |      |      |      |      |      |      |      |      |      |      |      | A29T              | 29.41                               | 0                   | Yes                              |     |
|                             | 15071    | T-C         |      |      |      |      |      |      |      |      |      |      |      |      |      |      |      |      |      |      |      | Y109H             | 28.71                               | 0                   | Yes                              |     |
|                             | 15204    | T-C         |      |      |      |      |      |      |      |      |      |      |      |      |      |      |      |      |      |      |      |                   | I153T                               | 78.57               | 3                                | Yes |
|                             | 15218    | A-G         |      |      |      |      |      |      |      |      |      |      |      |      |      |      |      |      |      |      |      | T158A             | 85.71                               | 2                   | Yes                              |     |
|                             | 15326    | A-G         | G    | G    | G    | G    | G    | G    | G    | G    | G    | G    | G    | G    | G    | G    | G    | G    | G    | G    | G    | T194A             | 64.29                               | 333                 | Yes                              |     |
|                             | 15651    | C-T         |      |      |      |      |      |      |      |      |      |      |      |      |      |      |      |      |      |      |      | A302V             | 70.59                               | 0                   | Yes                              |     |
|                             | 15662    | A-G         |      |      |      |      |      |      |      |      |      |      |      |      |      |      |      |      |      |      |      | G                 | I306V                               | 21.43               | 14                               | Yes |
|                             | 15851    | A-G         |      |      |      |      |      |      |      |      |      |      |      |      |      |      |      |      |      |      |      | G                 | I369V                               | 14.29               | 14                               | Yes |
|                             | 15924    | A-G         |      |      | G    |      |      |      |      |      |      |      |      |      |      |      |      |      |      |      |      |                   | 81.25                               | 4                   | Yes                              |     |
| 15927                       | G-A      |             |      |      |      |      |      |      |      |      |      |      |      |      |      |      |      |      |      |      |      | A                 | 68.75                               | 14                  | Yes                              |     |

<sup>§</sup>Conservation of amino acid for polypeptides or nucleotide for RNAs in 17 vertebrates: Bos Taurus, Cebus albifrons, Gorilla gorilla, Homo sapiens, Hylobates lar, Lemur catta, Macaca mulatta, Macaca sylvanus, Mus musculus, Nycticebus coucang, Pan paniscus, Pongo pygmaeus, Pongo abelii, Papio hamadryas, Tarsius bancanus, and Xenopus laevis.

<sup>#</sup>See the online mitochondrial genome database <http://www.mitomap.org> and <http://www.genpat.uu.se/mtDB>.

Table S4. Haplogroup distribution of mtDNA from 19 Han Chinese LHON families carrying m.3460G>A mutation and from 485 Chinese control subjects.

| Group                             | Microgroup M |     |      |     |      |      |     | Macrogroup N |     |      |      |      |      |      |     |
|-----------------------------------|--------------|-----|------|-----|------|------|-----|--------------|-----|------|------|------|------|------|-----|
|                                   | M8           | M9  | M7   | M11 | M12  | D    | G   | N9           | N10 | A    | B    | R9   | F    | H2   | U   |
| Frequency of mtDNA haplogroup (%) |              |     |      |     |      |      |     |              |     |      |      |      |      |      |     |
| Control (n=485)                   | 11.1         | 2.3 | 6.8  | 0.6 | 0.0  | 23.1 | 3.5 | 7.8          | 0.2 | 5.8  | 18.8 | 3.1  | 15.9 | 0.6  | 0.4 |
| LHON Pedigree (n=19)              | 10.5         | 0.0 | 15.8 | 0.0 | 5.3  | 21.1 | 0.0 | 0.0          | 0.0 | 5.3  | 15.8 | 5.3  | 15.8 | 5.3  | 0.0 |
| Ratio (affected males/females)    | 5:1          | -   | 2:3  | -   | 2:0  | 5:1  | -   | -            | -   | 1:5  | 7:0  | 1:2  | 3:2  | 1:0  | -   |
| Average penetrance (%)            | 30.6         | -   | 21.4 | -   | 33.3 | 16.7 | -   | -            | -   | 28.6 | 22.8 | 10.7 | 13.5 | 12.5 | -   |
| Average age-of-onset (years)      | 18           | -   | 19.7 | -   | 23   | 17.1 | -   | -            | -   | 28.7 | 20.6 | 18   | 17   | 14   | -   |
